# Supplementary figures and images for: The PERK arm of the unfolded protein response regulates satellite cell-mediated skeletal muscle regeneration
Source: eLife journal article supplement (doi:10.7554/elife.22871), 2017-03-23

**FIGURE 4-Figure supplement 2**

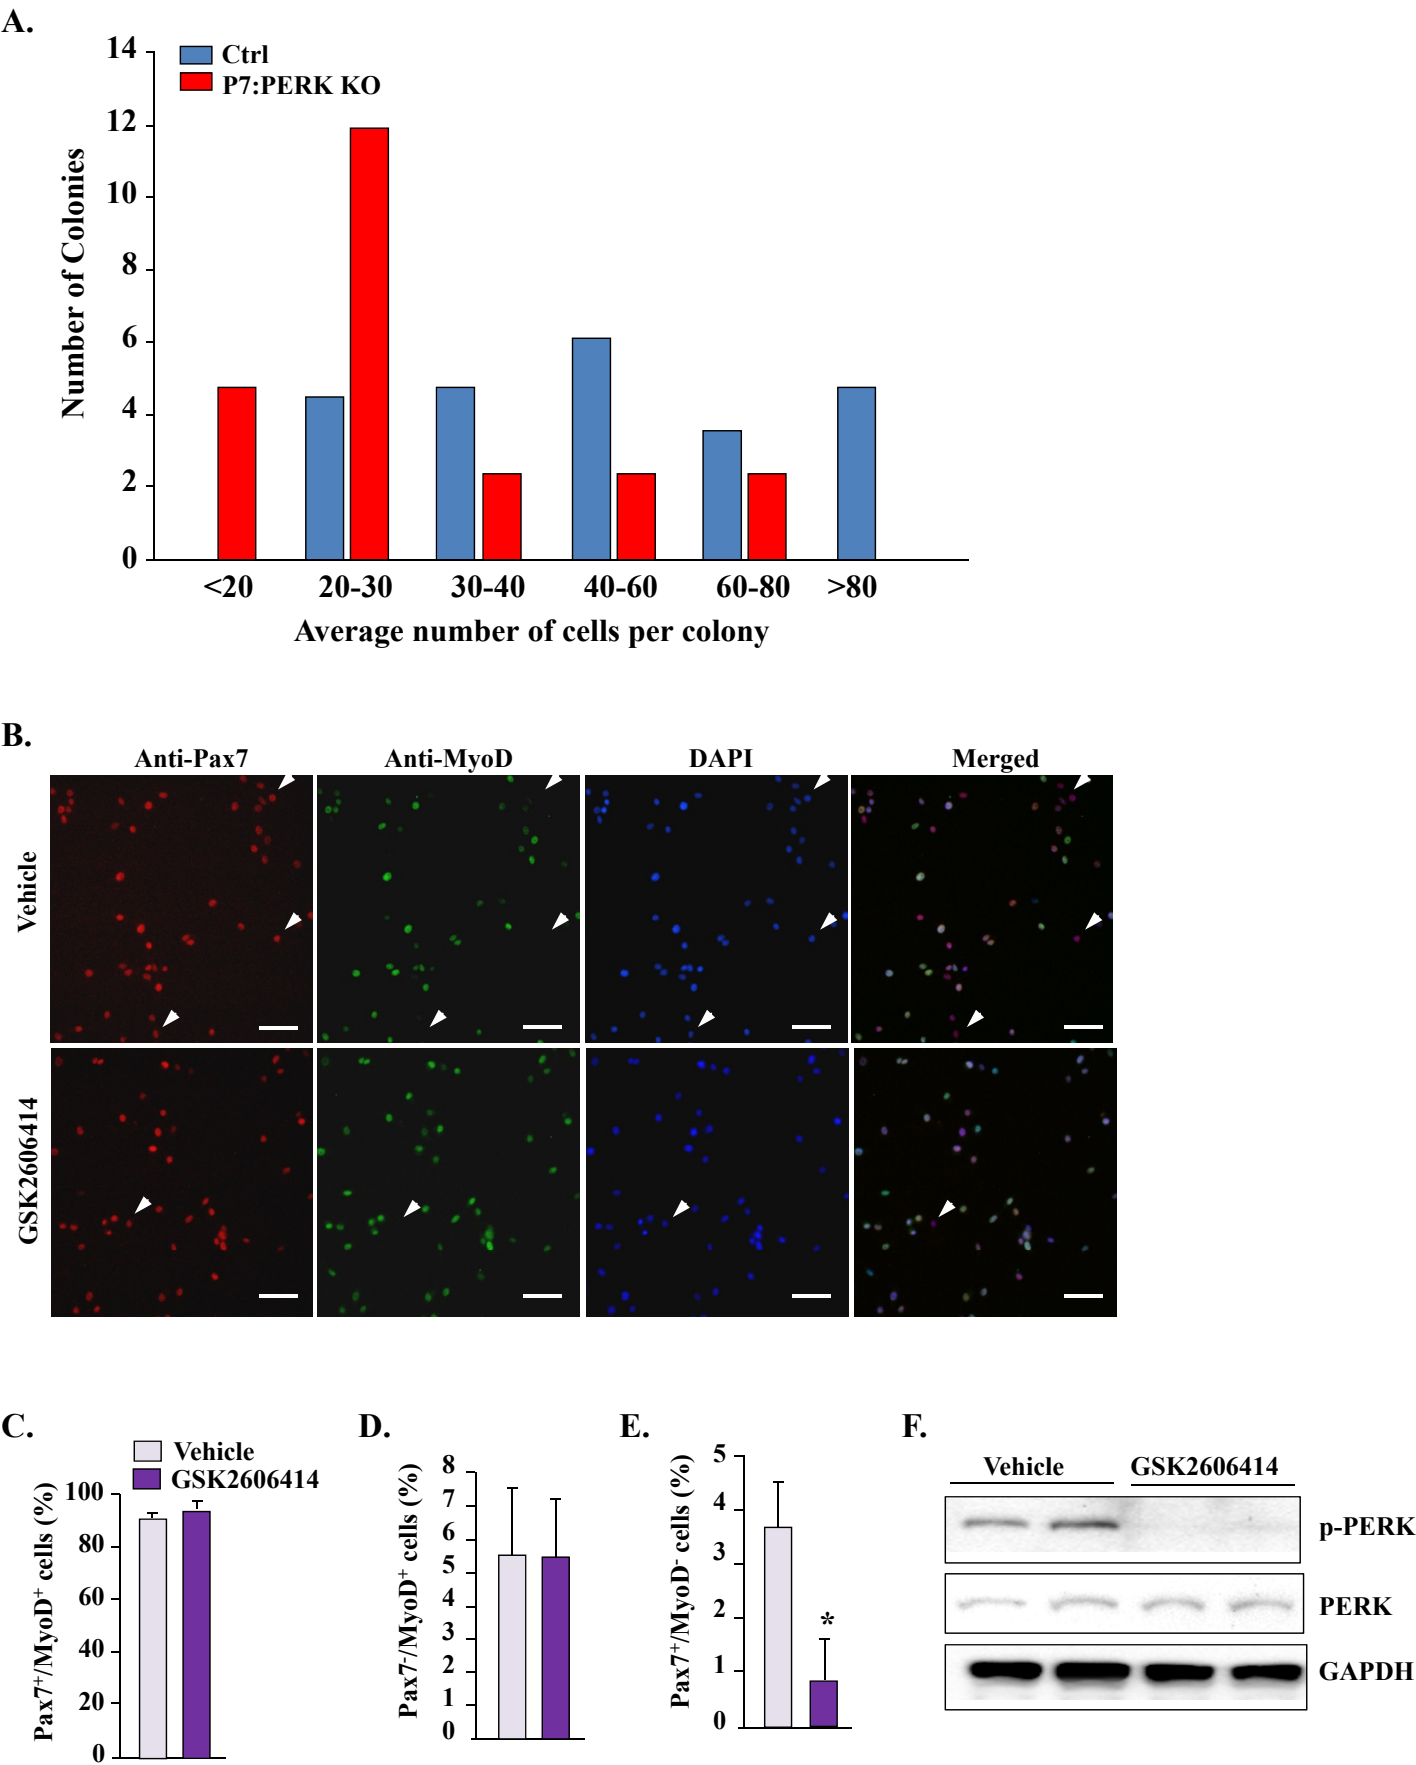

Supplement: supp [file elife-22871-supp-v1.zip]

**FIGURE 4-Figure supplement 1**

**A.**

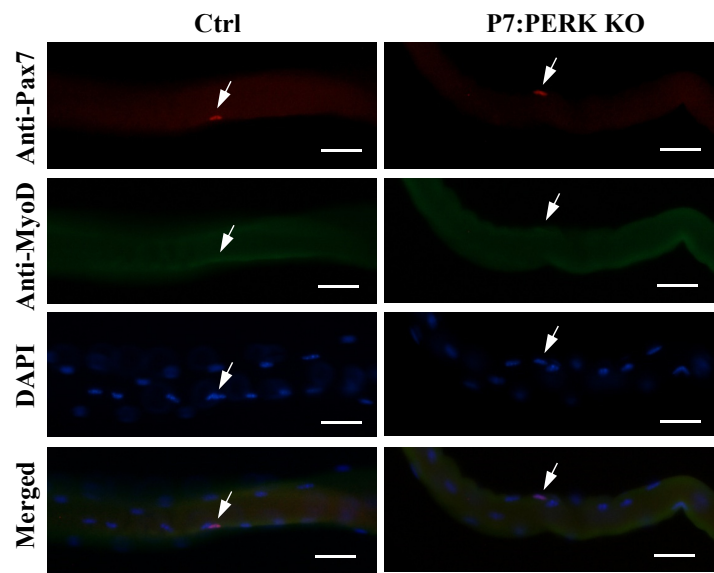

**B.**

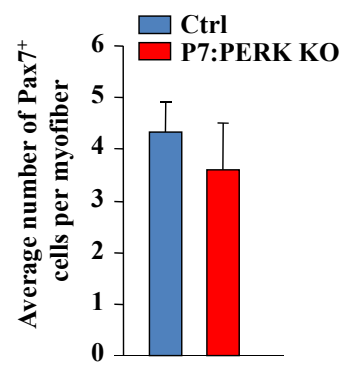

Supplement: supp [file elife-22871-supp-v1.zip]

**FIGURE 4-Figure supplement 3**

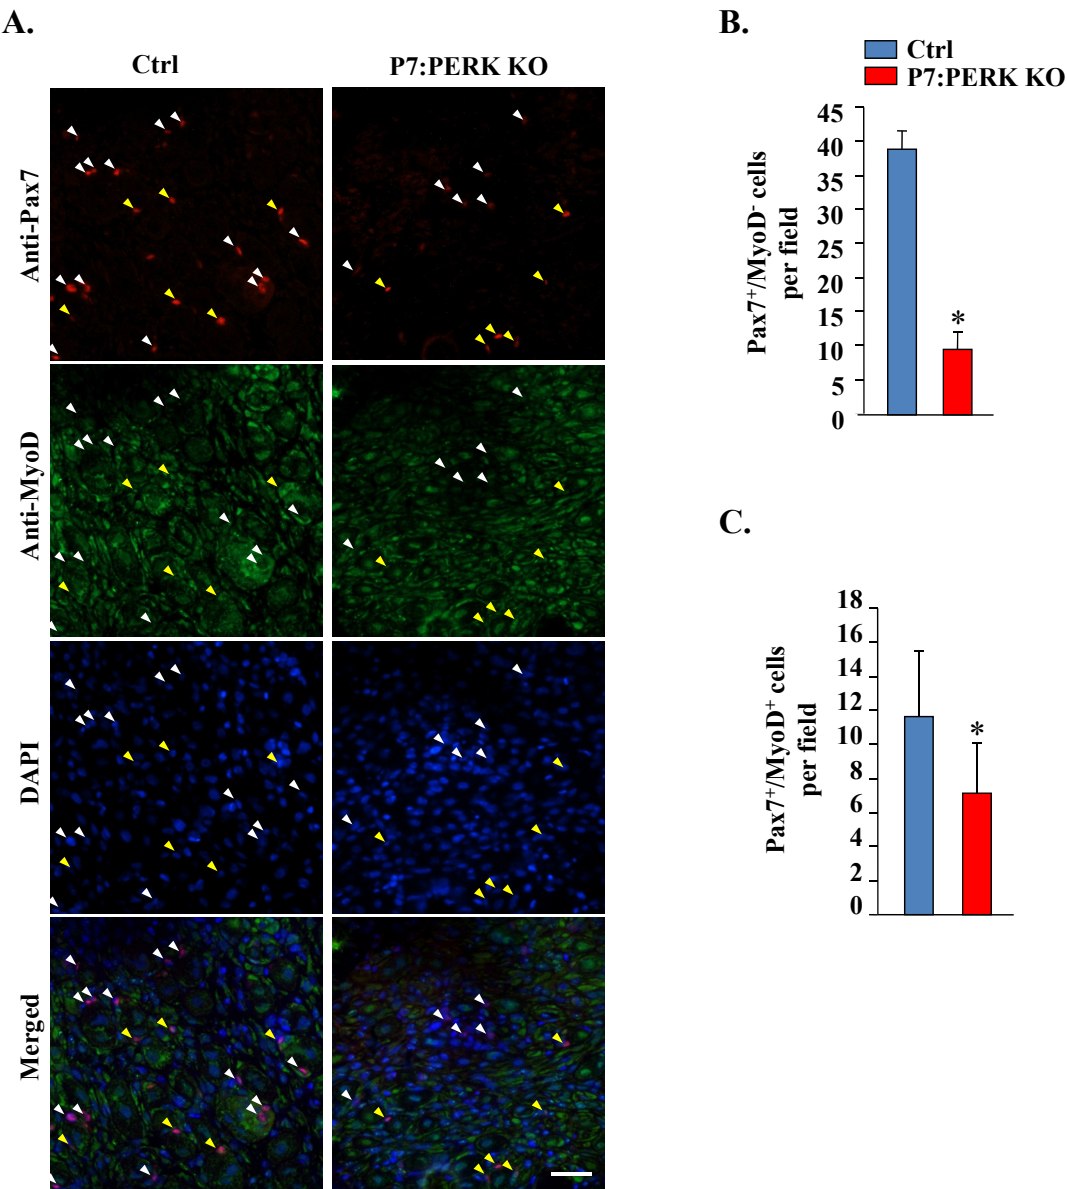

Supplement: supp [file elife-22871-supp-v1.zip]
